# Supplementary material for: Shoaled glacial AMOC despite vigorous tidal Dissipation: Vertical Stratification matters
Source: Copernicus journal article supplement (doi:10.5194/cp-2024-23), 2024-04-02
Supplement: Supplementary file 1 [file cp-2024-23-supplement.pdf]

*Supplement for*

**Shoaled glacial AMOC despite vigorous tidal Dissipation: Vertical Stratification matters**

**Yugeng Chen et al.**

*Correspondence to:* Yugeng Chen (Yugeng.chen@awi.de)

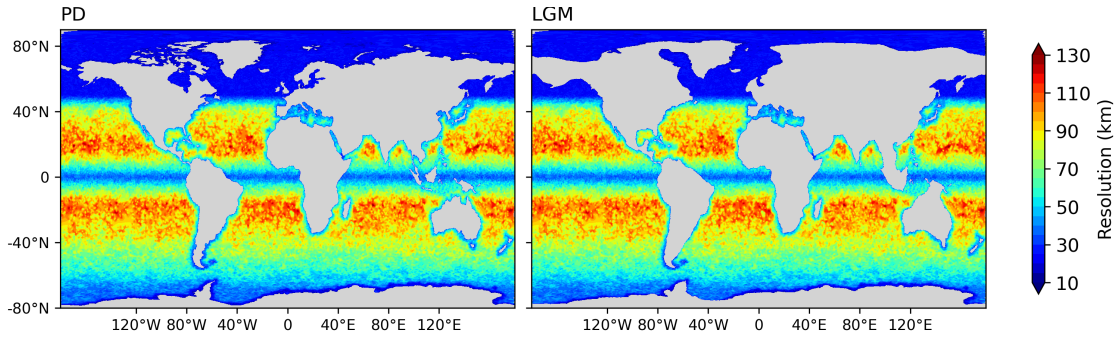

**Figure S1: Horizontal resolution of PD and LGM mesh configurations used in this study: PD (126,858 nodes and 244,659 cells) and LGM (104,425 nodes and 203,142 cells) meshes. The two meshes have the same resolution (nominal resolution of  $1^\circ$  in most parts of the global ocean,  $\sim 25$  km north of  $50^\circ$  N,  $\sim 1/3^\circ$  at the Equator, 10 km for the Arctic Ocean and Bering Sea).**

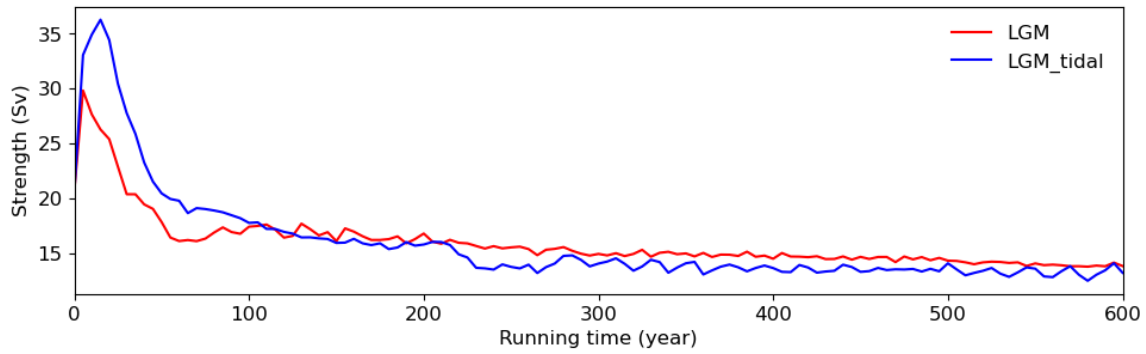

**Figure S2: Time series of AMOC Strength (maximum AMOC streamfunction below 300 m at  $26.5^\circ$  N) for LGM cases.**

**Table S1: Ocean Circulation Indexes of the simulations in this study. “NADW”: maximum AMOC streamfunction below 300 m at  $26.5^\circ$  N. “AMOC depth”: depth at which AMOC streamfunction is 0. “AABW”: minimum streamfunction north of  $30^\circ$  S.**

| Simulation       | NADW (Sv) | AMOC Depth (m) | AABW (Sv) |
|------------------|-----------|----------------|-----------|
| PD               | 12.4      | 2700           | -4.2      |
| PD_tidal         | 11.6      | 2700           | -5.5      |
| PD_glacial_tidal | 15.5      | 4600           | -5.3      |
| LGM              | 13.9      | 1700           | -5.6      |
| LGM_tidal        | 13.3      | 1700           | -7.9      |
